# Supplementary material for: Prediction of 3-Year Recurrence of Hemoptysis After Bronchial Artery Embolization in Bronchiectasis Patients Using the Computed Tomography Bronchiectasis Score
Source: Research Square preprint supplement (doi:10.21203/rs.3.rs-6109352/v1), 2025-03-04
Supplement: Supplementary file 1 [file 0043ba6c5b4322a5f28bc1a9.docx]

| Radiologic characteristic | Scoring | Max score | Min score |
| --- | --- | --- | --- |
| Type of bronchiectasis | Tubular=0 Varicose=1 Cystic = 2 | 2 | 0 |
| Bronchial dilation severity | Based on the worst dilated airway in the whole-lung Bronchial lumen diameter to artery diameter ratio: <2 = 0; ≥2 = 1; ≥3 = 2 | 2 | 0 |
| Bronchiectasis extent (across bronchopulmonary segments) | 1 point for each bronchopulmonary segment involved | 18 | 1 |
| Mucous plugging | At lobar level (six lobes*) Presence = 1 Absence = 0 | 6 | 0 |
| Wall thickness | At lobar level (six lobes*) Absence = 0 <50% of vessel diameter = 1 ≥50% of vessel diameter = 2 | 12 | 0 |
| Total |  | 40 | 1 |

**Table S1** The detailed CTBS scoring standards

* Lingula was considered as a separate lobe


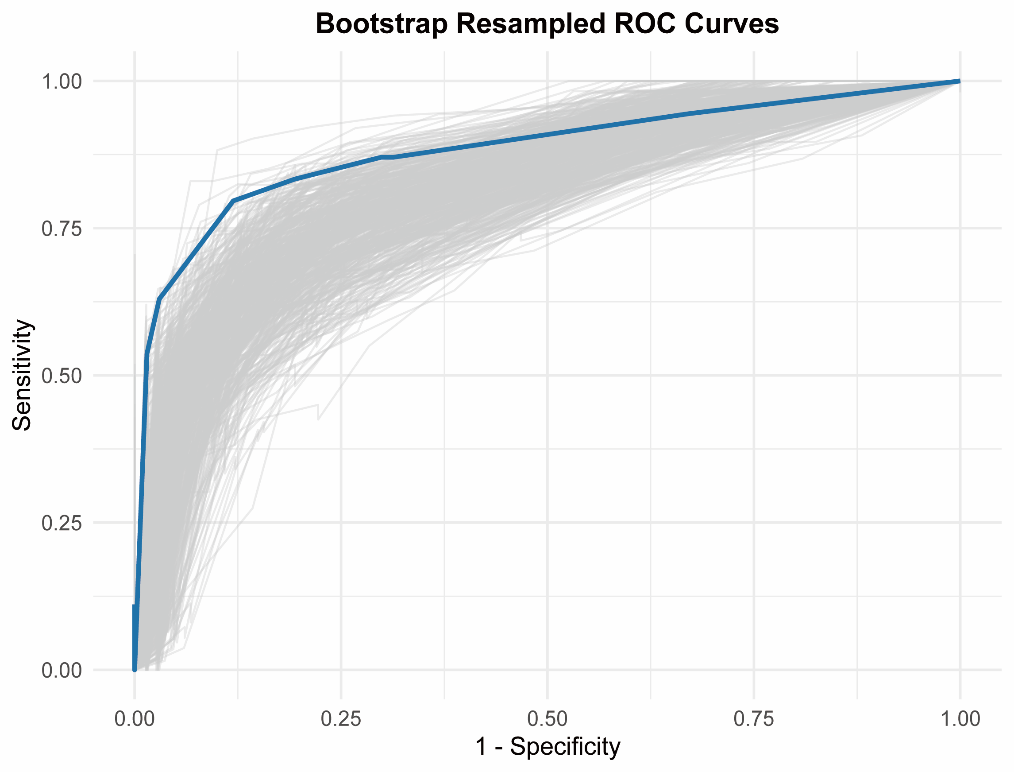


**Fig.S1** 1000 bootstrap resampled ROC curve


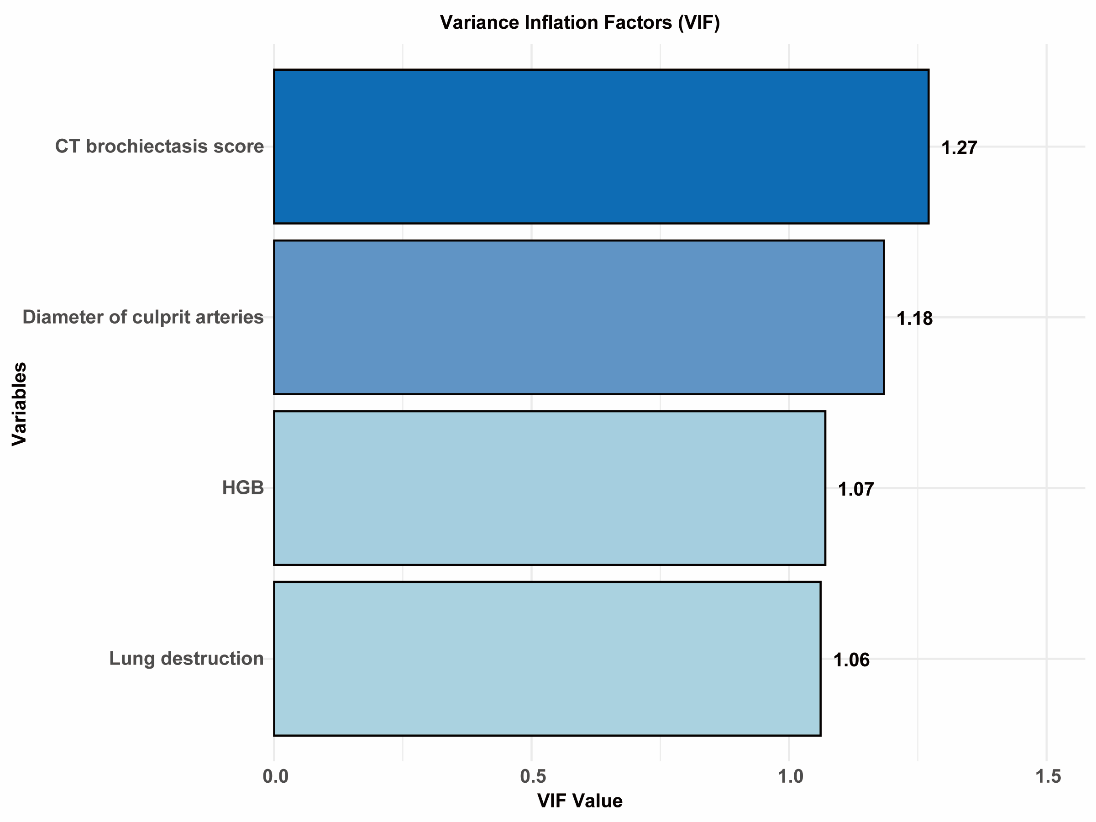


**Fig.S2** The VIF value of the variables enrolled in the model


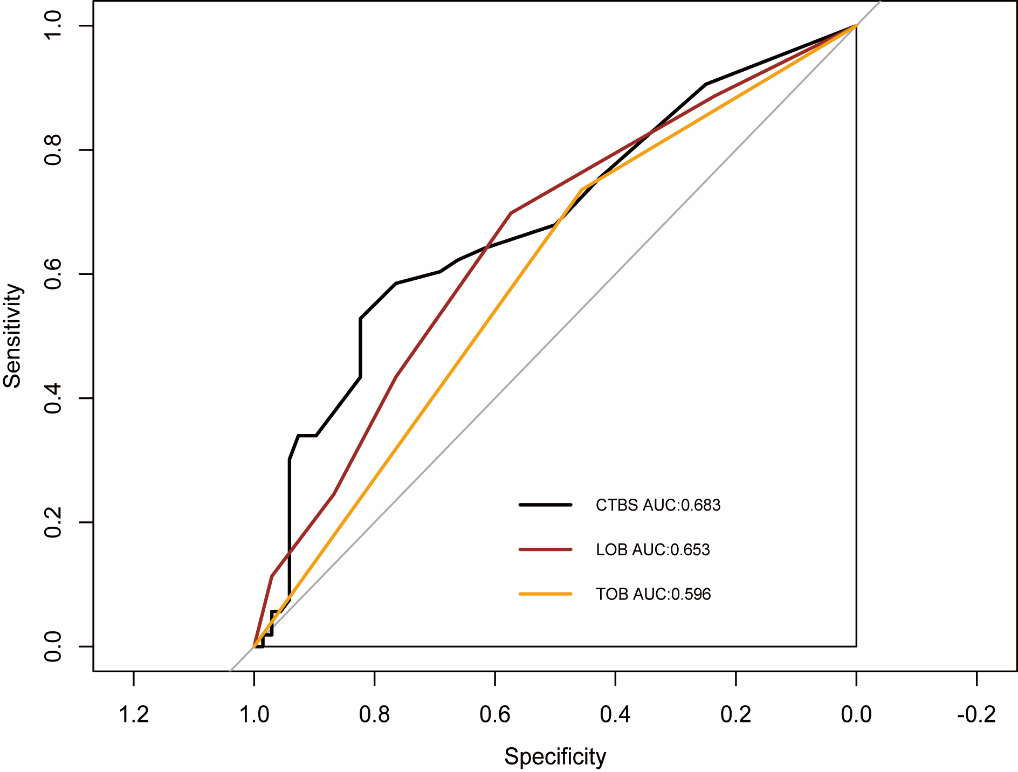


**Fig.S3** Prediction performance for 3-year hemoptysis recurrence by ROC curves. *LOB* lobes of bronchiectasis; *TOB* type of bronchiectasis

Fig.S1
